# Supplementary material for: Functional genomic analysis of constitutive and inducible defense responses to Fusarium verticillioides infection in maize genotypes with contrasting ear rot resistance
Source: PubMed Central journal article supplement (PMC4153945; doi:10.1186/1471-2164-15-710), 2014-08-25

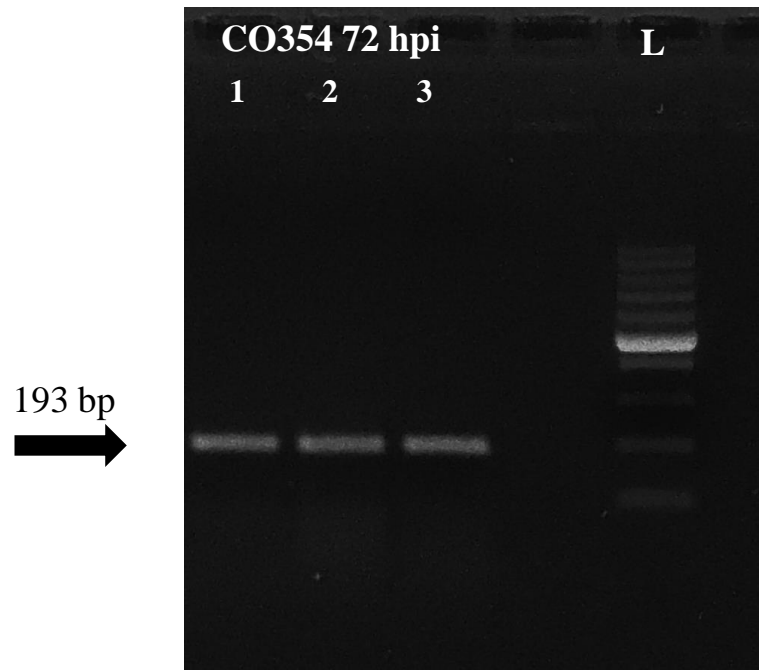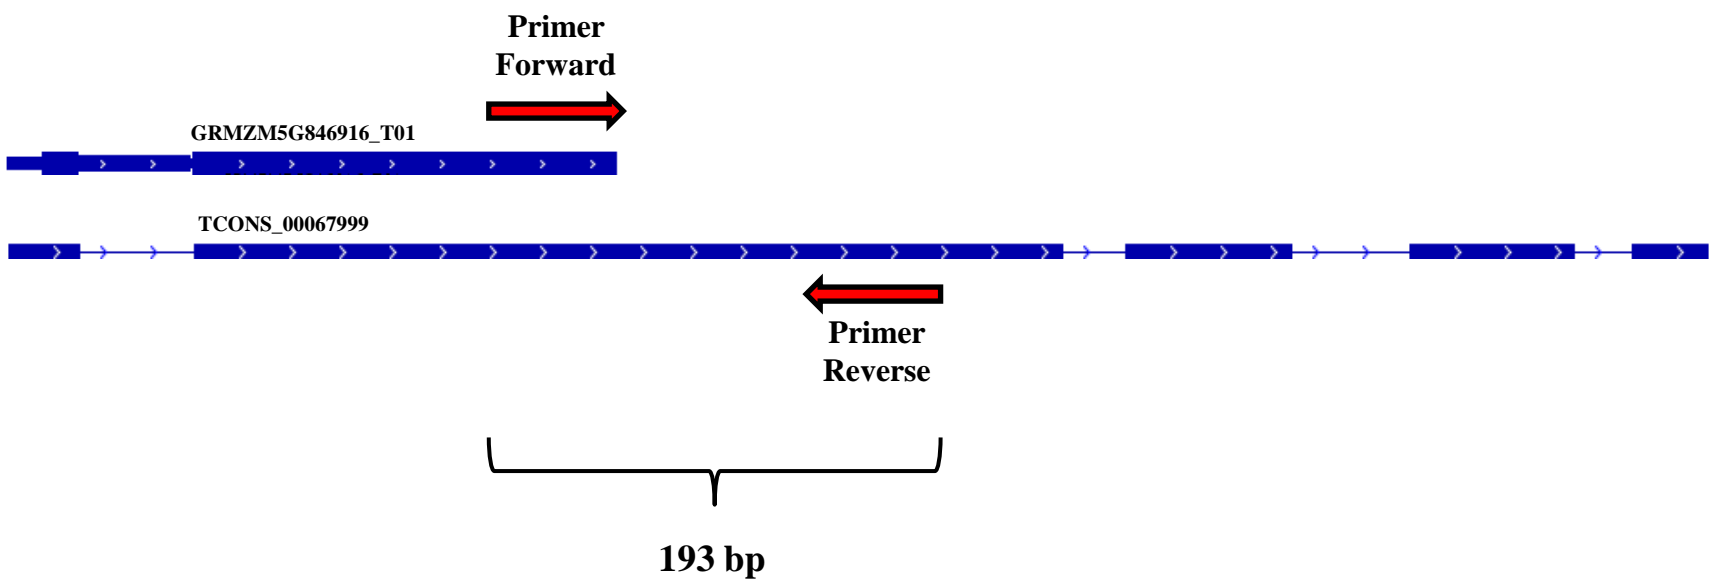

Supplement: 12864_2014_6392_MOESM12_ESM.pdf [file 12864_2014_6392_MOESM12_ESM.pdf]
